# Supplementary material
Source: publisher figshare collection journal article supplement (https://acs.figshare.com/ndownloader/files/5826381)
Supplement: Supplementary file 1 [file 5826381]

## Supporting Information

**General Experimental Procedures.** NMR spectra were recorded on a Varian 300 spectrometer operating at 300 MHz for  $^1\text{H}$  and at 75 MHz for  $^{13}\text{C}$  NMR spectra, respectively. COSY and NOESY spectra were recorded with standard pulse set up in the Varian program. Chloroform- $d_1$  and methanol- $d_4$  were used as solvent and TMS as internal standard. The optical rotation was determined on a Perkin-Elmer 241 polarimeter. *n*-Hexane, MeOH, MeCN,  $\text{CH}_2\text{Cl}_2$ ,  $\text{CHCl}_3$  and DMSO were all of HPLC grade from Merck (Darmstadt, Germany). D-Galactose and glycerol were of highest quality from Fluka (Buchs, Switzerland) and aqueous NaOH (50%) was obtained from J.T. Baker (Netherlands). Open-column chromatography was performed with silica gel 60 (63–200  $\mu\text{m}$ , Merck). TLC: silica gel 60 F<sub>254</sub> Al sheets (0.1 mm) (Merck), developed using 10%  $\text{H}_2\text{SO}_4$  in MeOH followed by heating. Preparative HPLC was carried out using a Merck L-6200 intelligent pump equipped with a Merck L-4200 UV detector. Separations were performed on a RP- $\text{C}_{18}$  column (particle size 5  $\mu\text{m}$ ; 250  $\times$  20 mm i.d., Develosil ODS-HG-5, Nomura Chemical Co., Japan) protected with a guard cartridge (50  $\times$  20 mm i.d.) packed with the same material as the column. Analytical HPLC was carried out on a SUMMIT/Dionex HPLC system (Dionex Denmark A/S, Denmark) equipped with a diode array detector (DAD) operating between 200–650 nm. Separations were performed on a LiChrospher 100 RP-  $\text{C}_{18}$  (particle size 5  $\mu\text{m}$ ; 244  $\times$  4 mm i.d., Merck) column. High performance anion exchange chromatography coupled with pulsed amperometric detection (HPAEC-PAD) was carried out on a Dionex series 300DX ion chromatograph system using a CarboPac PA10 column (250  $\times$  4 mm i.d., Dionex Denmark A/S, Denmark). Eluant 52 mM NaOH and flow rate 1.5 mL/min.

**Extraction and Isolation:** Dried and milled fruits of dog rose (1 kg) were sequentially extracted with *n*-hexane, CH<sub>2</sub>Cl<sub>2</sub>, MeOH and water. The dog rose powder was first submerged in *n*-hexane (2 L) overnight at room temperature, filtered and the powder washed with *n*-hexane (2 × 500 mL). The combined *n*-hexane solutions were evaporated to dryness under reduced pressure at below 40 °C. The powder was then submerged in CH<sub>2</sub>Cl<sub>2</sub>, MeOH and water, subsequently, following the same procedure as described above for extraction with *n*-hexane. The resulting *n*-hexane (30 g), CH<sub>2</sub>Cl<sub>2</sub> (10 g), MeOH (35 g) and water extracts (125 g) were tested for inhibition of chemotaxis of human peripheral blood neutrophils *in vitro*. The activity was confined to the CH<sub>2</sub>Cl<sub>2</sub> extract which was subjected to silica gel (400 g) open-column chromatography (column dimensions, 5 × 50 cm), eluting with a stepwise gradient of CH<sub>2</sub>Cl<sub>2</sub>–MeOH mixtures (100 mL 100:0, 100 mL 99:1, 100 mL 98:2, 150 mL 95:5, 150 mL 90:10, 450 mL 80:20, 950 mL 0:100) to give 20 fractions (fr. 1 to fr. 20, each fraction 100 mL). The individual fractions were concentrated *in vacuo* (below 40 °C) and tested for inhibition of chemotaxis of human peripheral blood neutrophils *in vitro*. The activity appeared to be confined to one major constituent in fr. 10–12 as shown by TLC (CH<sub>2</sub>Cl<sub>2</sub>–MeOH–H<sub>2</sub>O, 70:30:3, *R<sub>f</sub>* 0.46) and HPLC-DAD (see below). Fr. 10–12 (850 mg) was further separated by preparative HPLC on a RP-C<sub>18</sub> column eluting with a stepwise MeCN–H<sub>2</sub>O gradient (150 mL 25:75; 150 mL 50:50; 200 mL 60:40; 200 mL 70:30; 200 mL 80:20; 350 mL 90:10 and 400 mL 100:0, column temperature 35 °C, flow rate = 7 mL/min, UV detection at 203 nm, injection volume = 5 mL) to give 14 fractions (fr. 10–12.1 to fr. 10–12.14) of which only fr. 10–12.11 (*t<sub>R</sub>* ~ 163–179 min, 1145–1255 mL, fraction volume = 110 mL) showed high activity. The active principle in fr. 10–12.11 was found to be confined to one compound that was obtained as a colorless oil (250 mg) and identified as (2*S*)-1,2-di-*O*-[(9*Z*,12*Z*,15*Z*)-octadeca-9,12,15-

trienoyl]-3-*O*- $\beta$ -D-galactopyranosyl glycerol (**1**). The purity of the galactolipid **1** (> 98%) was determined by analytical HPLC-DAD using a LiChrospher RP-C<sub>18</sub> column and eluting with a MeCN–20% MeCN (aq) gradient (0–10 min (0:100), 10–25 min (from 0:100 to 50:50), 25–55 min (from 50:50 to 100:0), 55–64 min (100:0), gradient linear programmed, column temperature 35 °C, flow rate = 1 mL/min, injection volume = 20  $\mu$ l, UV detection at 203 nm,  $t_R$  (compound **1**) = 54 min). The structure of **1** was identified from the <sup>1</sup>H- and <sup>13</sup>C-NMR data (see Table I and Table II) and  $[\alpha]_D^{26}$  ( $[\alpha]_D^{26}$  –3.0° (*c* 0.4 CHCl<sub>3</sub>)) and by comparison with literature data.<sup>1–3</sup> The structure of **1** was further confirmed by basic methanolysis and acidic hydrolysis. Basic methanolysis<sup>2</sup> yielded methyl linolenate as the only methyl ester as shown by GC-MS, whereas acid hydrolysis in 4 N HCl afforded D-galactose and glycerol as shown by HPAEC-PAD.

**Table I.**  $^1\text{H}$ -NMR spectral data (300 MHz,  $\text{CDCl}_3$  and  $\text{CD}_3\text{OD}$ ,  $\delta$ -values in ppm) for compound **1**.

| H                                  | $\delta_{\text{H}}$ (multiplicity, $J$ in Hz)<br>in $\text{CDCl}_3$ | $\delta_{\text{H}}$ (multiplicity, $J$ in Hz)<br>in $\text{CD}_3\text{OD}$ |
|------------------------------------|---------------------------------------------------------------------|----------------------------------------------------------------------------|
| 1'                                 | 4.24 ( <i>d</i> , 6.8)                                              | 4.23 ( <i>d</i> , 6.6)                                                     |
| 2'                                 | 3.63 ( <i>m</i> )                                                   | 3.51 ( <i>dd</i> , 6.6, 9.7)                                               |
| 3'                                 | 3.54 ( <i>m</i> )                                                   | 3.45 ( <i>dd</i> , 2.1, 9.7)                                               |
| 4'                                 | 3.91 ( <i>m</i> )                                                   | 3.84 ( <i>dd</i> , 0.5, 2.1)                                               |
| 5'                                 | 3.58 ( <i>m</i> )                                                   | 3.48 ( <i>m</i> )                                                          |
| 6'a                                | { 3.88 ( <i>m</i> )                                                 | 3.73 ( <i>dd</i> , 6.6, 12.0)                                              |
| 6'b                                |                                                                     | 3.75 ( <i>dd</i> , 4.4, 12.0)                                              |
| 1a                                 | 4.22 ( <i>dd</i> , 6.8, 12.0)                                       | 4.22 ( <i>dd</i> , 6.9, 12.0)                                              |
| 1b                                 | 4.40 ( <i>dd</i> , 2.0, 12.0)                                       | 4.43 ( <i>br d</i> , 12.0)                                                 |
| 2                                  | 5.28 ( <i>m</i> )                                                   | 5.27 ( <i>m</i> )                                                          |
| 3a                                 | 3.72 ( <i>dd</i> , 6.0, 11.0)                                       | 3.71 ( <i>dd</i> , 5.4, 11.0)                                              |
| 3b                                 | 3.99 ( <i>m</i> )                                                   | 3.98 ( <i>dd</i> , 5.4, 10.8)                                              |
| 2'',2'''                           | 2.32 ( <i>br t</i> , 7.0)                                           | 2.32 ( <i>br t</i> , 7.0)                                                  |
| 3'',3'''                           | 1.60 ( <i>m</i> )                                                   | 1.60 ( <i>m</i> )                                                          |
| 4''-7'', 4'''-7'''                 | 1.32 ( <i>m</i> )                                                   | 1.35 ( <i>m</i> )                                                          |
| 8'',17'',8''',17'''                | 2.08 ( <i>m</i> )                                                   | 2.08 ( <i>m</i> )                                                          |
| 9'',10'',12'',13'',15'',16''       | 5.36 ( <i>m</i> )                                                   | 5.35 ( <i>m</i> )                                                          |
| 9''',10''',12''',13''',15''',16''' |                                                                     |                                                                            |
| 11'',14'', 11''', 14'''            | 2.81 ( <i>br t</i> , 6.8)                                           | 2.82 ( <i>br t</i> , 6.8)                                                  |
| 18'', 18'''                        | 0.97 ( <i>t</i> , 7.5)                                              | 0.98 ( <i>t</i> , 7.5)                                                     |

Abbreviations for multiplicity: *d* = doublet, *dd* = double doublet, *m* = multiplet, *t* = triplet.  
*br* = broad. Assignments based on  $^1\text{H}$ - $^1\text{H}$ -COSY and  $^1\text{H}$ - $^1\text{H}$ -NOESY NMR experiments.

**Table II.**  $^{13}\text{C}$ -NMR spectral data (75 MHz,  $\text{CDCl}_3$  and  $\text{CD}_3\text{OD}$ ,  $\delta$ -values in ppm) for compound 1.

| Assignments     | Multiplicity* | $\delta_{\text{C}}$ ( $\text{CDCl}_3$ ) | $\delta_{\text{C}}$ ( $\text{CD}_3\text{OD}$ ) |
|-----------------|---------------|-----------------------------------------|------------------------------------------------|
| C-1'            | <i>d</i>      | 104.3                                   | 106.3                                          |
| C-2'            | <i>d</i>      | 71.6                                    | 73.3                                           |
| C-3'            | <i>d</i>      | 73.7                                    | 75.7                                           |
| C-4'            | <i>d</i>      | 69.5                                    | 71.1                                           |
| C-5'            | <i>d</i>      | 74.8                                    | 77.7                                           |
| C-6'            | <i>t</i>      | 62.4                                    | 63.3                                           |
| C-1             | <i>t</i>      | 63.1                                    | 64.9                                           |
| C-2             | <i>d</i>      | 70.4                                    | 72.7                                           |
| C-3             | <i>t</i>      | 68.4                                    | 69.6                                           |
| C-1'', C-1'''   | <i>s</i>      | 174.1, 173.7                            | 176.1, 175.8                                   |
| C-2'', C-2'''   | <i>t</i>      | 34.5, 34.3                              | 36.0, 35.8                                     |
| C-3'', C-3'''   | <i>t</i>      | 25.1 <sup>a</sup>                       | 26.8 <sup>a</sup>                              |
| C-4'', C-4'''   | <i>t</i>      | 29.8 <sup>b</sup>                       | 31.6 <sup>b</sup>                              |
| C-5'', C-5'''   | <i>t</i>      | 29.5 <sup>b</sup>                       | 31.2 <sup>b</sup>                              |
| C-6'', C-6'''   | <i>t</i>      | 29.4 <sup>b</sup>                       | 31.1 <sup>b</sup>                              |
| C-7'', C-7'''   | <i>t</i>      | 29.3 <sup>b</sup>                       | 31.0 <sup>b</sup>                              |
| C-8'', C-8'''   | <i>t</i>      | 27.4                                    | 29.0                                           |
| C-9'', C-9'''   | <i>d</i>      | 132.2 <sup>c</sup>                      | 133.8 <sup>c</sup>                             |
| C-10'', C-10''' | <i>d</i>      | 130.4 <sup>c</sup>                      | 132.1 <sup>c</sup>                             |
| C-11'', C-11''' | <i>t</i>      | 25.9 <sup>a</sup>                       | 27.4 <sup>a</sup>                              |
| C-12'', C-12''' | <i>d</i>      | 128.6 <sup>c</sup>                      | 130.2 <sup>c</sup>                             |
| C-13'', C-13''' | <i>d</i>      | 128.5 <sup>c</sup>                      | 130.2 <sup>c</sup>                             |
| C-14'', C-14''' | <i>t</i>      | 25.8 <sup>a</sup>                       | 27.3 <sup>a</sup>                              |
| C-15'', C-15''' | <i>d</i>      | 128.0 <sup>c</sup>                      | 129.9 <sup>c</sup>                             |
| C-16'', C-16''' | <i>d</i>      | 127.3 <sup>c</sup>                      | 129.2 <sup>c</sup>                             |
| C-17'', C-17''' | <i>t</i>      | 20.8                                    | 22.3                                           |
| C-18'', C-18''' | <i>q</i>      | 14.5                                    | 15.5                                           |

\*Multiplicity determined by DEPT and HETCOR-NMR experiments. Abbreviations for multiplicity: *s* = singlet, *d* = doublet, *t* = triplet, *q* = quartet. <sup>a</sup>, <sup>b</sup>, <sup>c</sup> In the same column: These assignments may be interchanged.

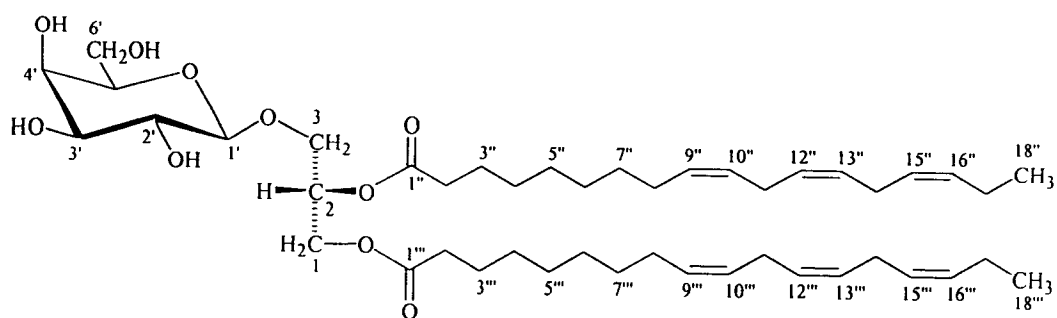

1

## References

1. Wegner, C.; Hamburger, M.; Kunert, O.; Haslinger, E. *Helv. Chim. Acta* **2000**, *83*, 1454–1464.
2. Murakami, A.; Nakamura, Y.; Koshimizu, K.; Ohigashi, H. *J. Agric. Food Chem.* **1995**, *43*, 2779–2783.
3. Olugbade, T. A.; Adesanya, S. A. *Phytochemistry* **2000**, *54*, 867–870.
